# Supplementary material for: Treatment outcomes of patients with MDR-TB in Nepal on a current programmatic standardised regimen: retrospective single-centre study
Source: PubMed Central journal article supplement (PMC7430340; doi:10.1136/bmjresp-2020-000606), 2020-08-12
Supplement: bmjresp-2020-000606supp001.pdf [file bmjresp-2020-000606supp001.pdf]

Supplementary material:

**Factors associated with treatment outcome at the end of treatment using univariate logistic regression analysis**

| Independent variables (n=98)                         | Treatment outcome |                     | OR (0.95% CI)     | p-value |
|------------------------------------------------------|-------------------|---------------------|-------------------|---------|
|                                                      | Successful (n=85) | Unsuccessful (n=13) |                   |         |
| *Age                                                 | 29 (22-40)        | 33.5 (25- 44.7)     | 0.97 (0.95-1.04)  | 0.896   |
| *Body weight at admission                            | 48 (45-57.5)      | 47.0 (36.2-60.5)    | 1.03 (0.97-1.09)  | 0.347   |
| *Body weight after 8 months (n=85)                   | 56 (47-60)        | 43.2 (10.5-NA)      | 1.08 (0.98-1.18)  | 0.140   |
| *Levofloxacin dose, mg/kg                            | 15.6 (13.5-17.0)  | 16 (12.92-18.35)    | 0.99 (0.80-1.22)  | 0.929   |
| <b>Gender</b>                                        |                   |                     |                   |         |
| Male                                                 | 48 (56.5)         | 7 (58.3)            | 0.93 (0.27-3.15)  | 0.903   |
| Female                                               | 37 (43.5)         | 5 (41.7)            | Ref               |         |
| <b>Prior anti-TB therapy</b>                         |                   |                     |                   |         |
| No                                                   | 8 (9.4)           | 2 (16.7)            | Ref               | 0.446   |
| Yes                                                  | 77 (90.6)         | 10 (83.3)           | 1.92 (0.35-10.36) |         |
| *Days of sputum conversion (n=75)                    | 90 (60-105)       | 45 (30-112.5)       | 1.01 (0.98-1.04)  | 0.321   |
| *Days of culture conversion (n=81)                   | 90 (60-90)        | 30 (30-37.5)        | 1.09 (1.03-1.15)  | 0.002   |
| <b>Alcohol abuse (n=84)</b>                          |                   |                     |                   |         |
| No                                                   | 62 (82.7)         | 8 (88.9)            | Ref               | 0.639   |
| Yes                                                  | 13 (17.3%)        | 1 (11.1%)           | 1.67 (0.19-14.51) |         |
| <b>Chest Radiography (n=80)</b>                      |                   |                     |                   |         |
| Cavitary lesion                                      | 5 (5.9)           | 1 (8.3)             | 0.80 (0.07-8.75)  | 0.855   |
| Bilateral pulmonary involvement with cavitary lesion | 10 (11.8)         | 1 (8.3)             | 1.60 (0.16-16.13) | 0.690   |
| Bilateral pulmonary involvement                      | 32 (37.6)         | 2 (16.7)            | 2.6 (0.43-15.12)  | 0.300   |
| Non cavitary non-bilateral pulmonary involvement     | 25 (29.4)         | 4 (33.3)            | Ref               |         |

Data are presented as n (%), unless otherwise stated: \*median (interquartile ranges). OR: odds ratio; CI: confidence intervals
